# Supplementary material for: Mirar, pensar, debatir. Colaboración con la Filmoteca de Andalucía como recursos de innovación docente en las Humanidades
Source: Royal Society of Chemistry journal article supplement (doi:10.1039/b818825d), 2010-01-01
Supplement: b818825d.pdf [file b818825d.pdf]

# Au nanoparticle electrocatalysis in a photoelectrochemical solar cell using CdS quantum dot-sensitized TiO<sub>2</sub> photoelectrodes

Tomokazu Kiyonaga,<sup>a</sup> Tomoki Akita<sup>b</sup> and Hiroaki Tada<sup>a\*</sup>

<sup>a</sup> Department of Applied Chemistry, School of Science and Engineering, Kinki University, 3-4-1, Kowakae, Higashi-Osaka, Osaka 577-8502, Japan

Email: [h-tada@apch.kindai.ac.jp](mailto:h-tada@apch.kindai.ac.jp)

<sup>b</sup> National Institute of Advanced Industrial Science and Technology, Midorigaoka 1-8-31, Ikeda, Osaka 563-8577, Japan

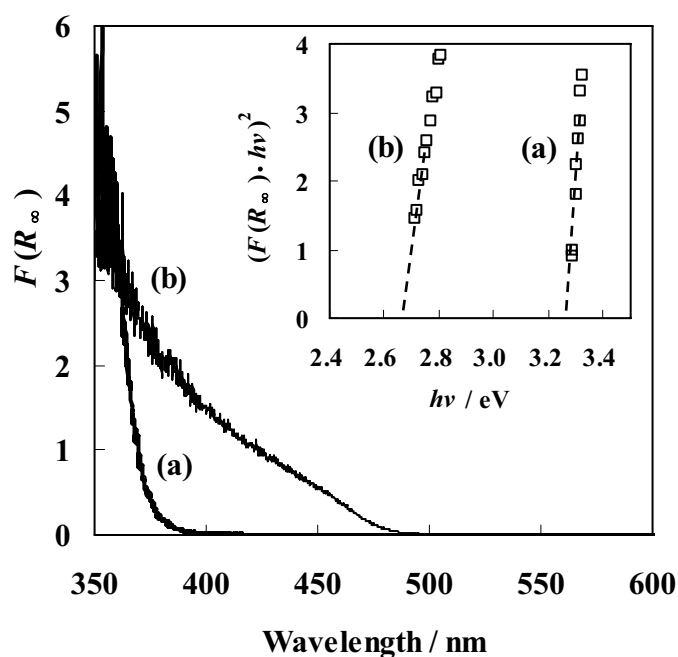

**Fig. S1:** Electronic absorption spectra of mp-TiO<sub>2</sub> (a) and CdS/mp-TiO<sub>2</sub> (b):  $F(R_{\infty})$  expresses the Kubelka-Munk function. The inset shows the corresponding Tauc's plots.

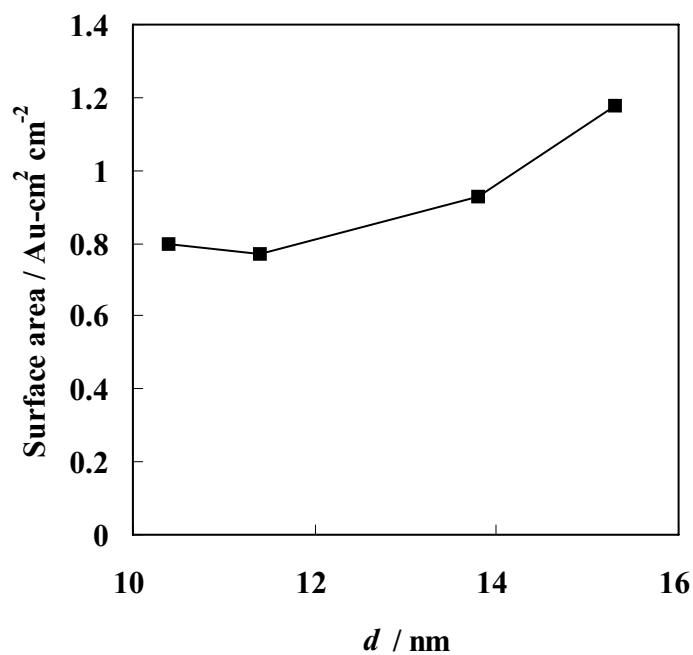

**Fig. S2:** Au surface area of Au/SnO<sub>2</sub> as a function of  $d$ . The surface area of Au NPs was calculated from their loading amount and  $d$  value by assuming that Au particle is hemisphere.

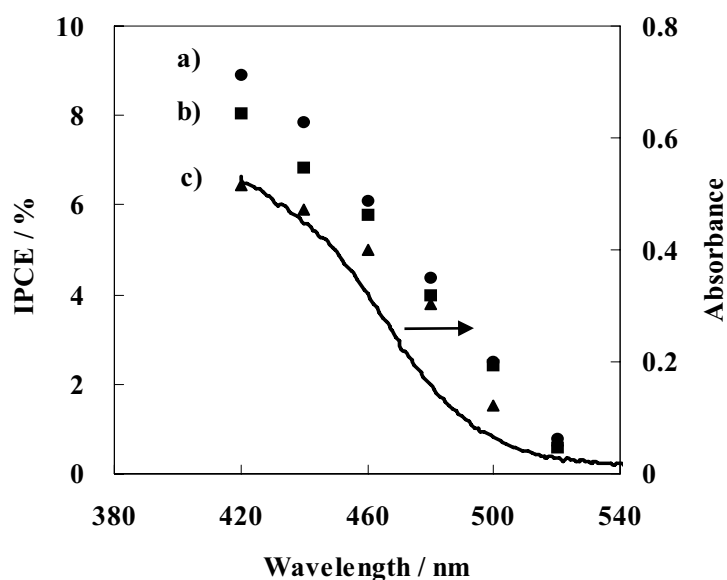

**Fig. S3:** IPCE action spectra of the CdS/mp-TiO<sub>2</sub>[S<sub>x</sub><sup>2-</sup>/S<sup>2-</sup>]CE and electronic absorption spectrum (solid line) of the CdS/mp-TiO<sub>2</sub> (right). The CEs are Pt ( $d = 6.9 \text{ nm}$ )/SnO<sub>2</sub> (a), Pt ( $d = 10.7 \text{ nm}$ )/SnO<sub>2</sub> (b), Pt ( $d = 15.2 \text{ nm}$ )/SnO<sub>2</sub> (c).

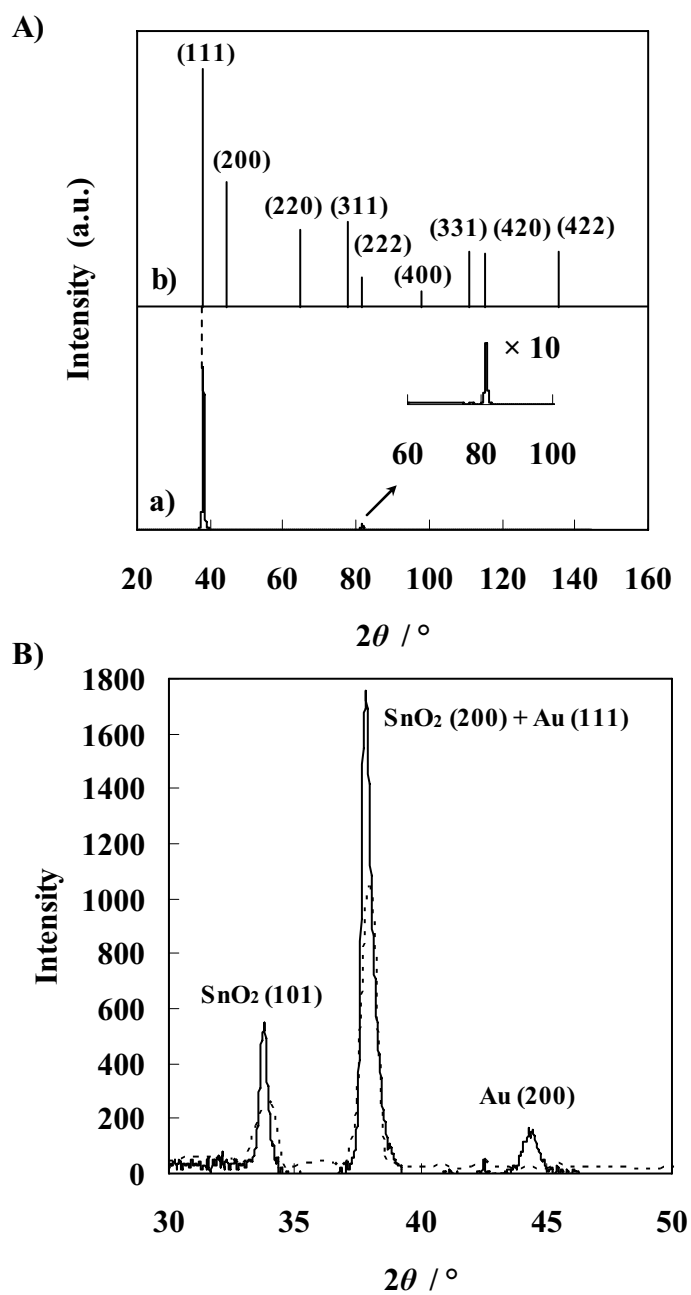

**Fig. S4:** A, XRD patterns of Au thin film (a) and random oriented Au (b). B, XRD patterns of SnO<sub>2</sub> (dotted curve) and Au/SnO<sub>2</sub> (solid curve).
